# Supplementary material for: Gender, age, and concomitant diseases of melanosis coli in China: a multicenter study of 6,090 cases
Source: PeerJ. 2018 Mar 8;6:e4483. doi: 10.7717/peerj.4483 (PMC5845562; doi:10.7717/peerj.4483)
Supplement: Supplemental Information 1 [file peerj-06-4483-s001.xls]

## Sheet: Sheet1
No.	Gender(male=1,female=0)	Age(years)	Year on Colonoscopy(20**)	MC(melanosis coli;yes=1,no=0)	Concomitant diseases (polyps=1,inflammtion=2,cancer=3,diverticular=4,non=0)
1	1	72.0	2014	1	1
2	1	41.0	2014	1	0
3	0	60.0	2014	1	0
4	0	41.0	2014	1	0
5	0	50.0	2014	1	0
6	1	58.0	2014	1	0
7	0	35.0	2014	1	0
8	1	77.0	2014	1	1
9	1	68.0	2014	1	1
10	1	63.0	2014	1	0
11	0	35.0	2014	1	1
12	0	61.0	2014	1	0
13	0	69.0	2014	1	0
14	1	61.0	2014	1	1
15	0	75.0	2014	1	0
16	1	74.0	2014	1	0
17	1	57.0	2014	1	1
18	0	45.0	2014	1	0
19	0	66.0	2014	1	1
20	0	58.0	2014	1	0
21	1	73.0	2014	1	0
22	1	51.0	2014	1	0
23	1	57	2016	1	0
24	0	59	2016	1	0
25	1	62	2016	1	0
26	0	54	2016	1	0
27	0	41.0	2014	1	1
28	0	46.0	2014	1	0
29	0	55.0	2014	1	1
30	1	78.0	2014	1	1
31	1	72.0	2014	1	0
32	0	51.0	2014	1	1
33	1	51.0	2014	1	1
34	0	76.0	2014	1	0
35	0	52.0	2014	1	0
36	1	79.0	2014	1	0
37	0	71.0	2014	1	0
38	0	51.0	2014	1	0
39	0	76.0	2014	1	1
40	1	69.0	2014	1	1
41	0	46.0	2014	1	0
42	0	45.0	2014	1	0
43	1	57.0	2014	1	1
44	1	62.0	2014	1	1
45	0	58.0	2014	1	0
46	1	47.0	2014	1	0
47	1	70.0	2014	1	1
48	1	60.0	2014	1	0
49	0	61.0	2014	1	0
50	1	60.0	2014	1	0
51	0	65.0	2014	1	0
52	0	61.0	2014	1	0
53	1	58.0	2014	1	0
54	0	57.0	2014	1	2
55	0	51.0	2014	1	0
56	0	54.0	2014	1	0
57	1	28.0	2014	1	0
58	1	56.0	2014	1	1
59	0	52.0	2014	1	0
60	0	60.0	2014	1	1
61	0	46.0	2014	1	2
62	0	78.0	2014	1	1
63	0	33.0	2014	1	0
64	1	86.0	2014	1	1
65	1	76.0	2014	1	1
66	0	66.0	2014	1	0
67	0	57.0	2014	1	0
68	0	72.0	2014	1	1
69	0	41.0	2014	1	0
70	0	57.0	2014	1	0
71	0	52.0	2014	1	0
72	1	72	2016	1	1
73	0	61.0	2014	1	0
74	1	67.0	2014	1	1
75	0	56.0	2014	1	0
76	0	80.0	2014	1	0
77	0	60.0	2014	1	0
78	0	43.0	2014	1	0
79	0	59.0	2014	1	2
80	0	48.0	2014	1	0
81	0	44.0	2014	1	0
82	1	73.0	2014	1	1
83	0	45.0	2014	1	0
84	1	84.0	2014	1	0
85	0	62.0	2014	1	2
86	1	51.0	2014	1	0
87	0	50.0	2014	1	1
88	0	60.0	2014	1	0
89	0	50.0	2014	1	0
90	1	66.0	2014	1	1
91	1	55.0	2014	1	0
92	0	60.0	2014	1	1
93	0	37.0	2014	1	0
94	0	70.0	2014	1	1
95	0	39.0	2014	1	0
96	1	77.0	2014	1	0
97	0	85.0	2014	1	1
98	0	66.0	2014	1	1
99	0	49.0	2014	1	0
100	1	80.0	2014	1	1
101	0	71.0	2014	1	1
102	0	40.0	2014	1	0
103	0	54.0	2014	1	0
104	1	80.0	2014	1	0
105	0	76.0	2014	1	0
106	1	80.0	2014	1	1
107	1	68.0	2014	1	0
108	0	44.0	2014	1	0
109	0	66.0	2014	1	1
110	1	82.0	2014	1	1
111	0	50.0	2014	1	0
112	1	24.0	2014	1	0
113	0	57.0	2014	1	1
114	1	43.0	2014	1	0
115	1	67.0	2014	1	0
116	0	28.0	2014	1	0
117	0	44.0	2014	1	0
118	0	61.0	2014	1	0
119	0	32.0	2014	1	0
120	1	60.0	2014	1	0
121	0	79.0	2014	1	1
122	1	86.0	2014	1	0
123	0	28.0	2014	1	0
124	0	51.0	2014	1	0
125	0	41.0	2014	1	0
126	0	61.0	2014	1	1
127	1	62.0	2014	1	0
128	1	78.0	2014	1	2
129	0	65.0	2014	1	0
130	0	59.0	2014	1	1
131	0	75.0	2014	1	1
132	1	68.0	2014	1	1
133	0	81.0	2014	1	1
134	1	79.0	2014	1	1
135	1	49	2015	1	1
136	0	66	2015	1	1
137	1	73	2015	1	1
138	0	66	2015	1	1
139	0	67	2015	1	0
140	0	57	2015	1	0
141	0	58	2015	1	1
142	1	62	2016	1	1
143	0	50	2016	1	0
144	1	39.0	2014	1	1
145	0	60.0	2014	1	0
146	1	59.0	2014	1	0
147	0	46.0	2014	1	0
148	0	74.0	2014	1	1
149	1	71.0	2014	1	0
150	0	38.0	2014	1	0
151	0	65.0	2014	1	0
152	0	67.0	2014	1	0
153	0	61.0	2014	1	0
154	0	25.0	2014	1	0
155	0	59.0	2014	1	0
156	0	44.0	2014	1	1
157	1	79.0	2014	1	4
158	1	58.0	2014	1	0
159	0	61.0	2014	1	0
160	0	53.0	2014	1	1
161	0	46.0	2014	1	0
162	0	65.0	2014	1	0
163	0	67.0	2014	1	1
164	0	68.0	2014	1	0
165	0	67.0	2014	1	1
166	1	45.0	2014	1	1
167	1	48.0	2014	1	0
168	0	50.0	2014	1	0
169	0	72.0	2014	1	0
170	0	37.0	2014	1	0
171	1	34.0	2014	1	0
172	0	70.0	2014	1	1
173	0	45.0	2014	1	0
174	1	39.0	2014	1	1
175	0	69.0	2014	1	1
176	0	60.0	2014	1	1
177	0	68.0	2014	1	1
178	0	61.0	2014	1	1
179	0	68.0	2014	1	1
180	0	70.0	2014	1	0
181	0	47.0	2014	1	1
182	1	57.0	2014	1	3
183	1	58.0	2014	1	0
184	0	39.0	2014	1	0
185	0	58.0	2014	1	1
186	1	73.0	2014	1	1
187	0	64.0	2014	1	0
188	1	72.0	2014	1	0
189	1	55.0	2014	1	0
190	1	60.0	2014	1	0
191	1	68.0	2014	1	1
192	0	71.0	2014	1	0
193	0	40.0	2014	1	0
194	1	67.0	2014	1	1
195	1	59.0	2014	1	1
196	0	61.0	2014	1	1
197	0	35.0	2014	1	0
198	1	85.0	2014	1	1
199	0	28.0	2014	1	0
200	1	71.0	2014	1	1
201	1	58.0	2014	1	1
202	0	61.0	2014	1	0
203	0	54.0	2014	1	0
204	0	40.0	2014	1	0
205	1	69.0	2014	1	1
206	0	68.0	2014	1	0
207	0	78.0	2014	1	0
208	0	49.0	2014	1	0
209	1	66.0	2014	1	0
210	1	73.0	2014	1	1
211	0	32.0	2014	1	0
212	0	45.0	2014	1	0
213	0	21.0	2014	1	0
214	0	48.0	2014	1	1
215	1	70.0	2014	1	0
216	0	73.0	2014	1	0
217	0	62.0	2014	1	0
218	1	54.0	2014	1	0
219	0	62.0	2014	1	0
220	1	50.0	2014	1	0
221	1	58.0	2014	1	1
222	0	45.0	2014	1	3
223	0	67.0	2014	1	1
224	1	73.0	2014	1	1
225	0	70.0	2014	1	1
226	0	40.0	2014	1	1
227	0	59.0	2014	1	0
228	0	51.0	2014	1	0
229	0	39.0	2014	1	0
230	0	62.0	2014	1	0
231	0	59.0	2014	1	0
232	0	55.0	2014	1	0
233	1	56.0	2014	1	0
234	0	45.0	2014	1	0
235	0	50.0	2014	1	0
236	1	22.0	2014	1	0
237	1	78.0	2014	1	0
238	1	52.0	2014	1	0
239	0	46.0	2014	1	1
240	1	43.0	2014	1	2
241	1	63.0	2014	1	1
242	0	37.0	2014	1	0
243	0	84.0	2014	1	3
244	1	46.0	2014	1	0
245	1	78.0	2014	1	0
246	0	51.0	2014	1	0
247	0	51.0	2014	1	0
248	0	43.0	2014	1	1
249	1	55.0	2014	1	1
250	0	56.0	2014	1	2
251	1	70.0	2014	1	1
252	1	47.0	2014	1	1
253	0	43.0	2014	1	0
254	1	63.0	2014	1	0
255	1	71.0	2014	1	0
256	0	55	2015	1	0
257	1	51	2015	1	1
258	0	36.0	2008	1	0
259	0	51.0	2008	1	0
260	1	67.0	2008	1	0
261	1	78.0	2008	1	0
262	0	56.0	2008	1	1
263	0	68.0	2008	1	0
264	1	62.0	2008	1	0
265	1	48.0	2008	1	0
266	0	64.0	2008	1	0
267	0	66.0	2008	1	0
268	1	71.0	2008	1	1
269	0	55.0	2008	1	0
270	0	66.0	2008	1	0
271	0	61.0	2008	1	0
272	1	62.0	2008	1	0
273	0	67.0	2008	1	0
274	0	43.0	2008	1	0
275	0	52.0	2008	1	0
276	0	70.0	2008	1	0
277	1	55.0	2008	1	0
278	0	47.0	2008	1	0
279	0	54.0	2008	1	0
280	1	51.0	2008	1	0
281	1	53.0	2008	1	0
282	0	23.0	2008	1	0
283	0	56.0	2008	1	0
284	0	51.0	2014	1	1
285	0	52.0	2014	1	0
286	0	65.0	2014	1	0
287	1	54.0	2014	1	0
288	0	70.0	2014	1	0
289	0	45.0	2014	1	0
290	0	38.0	2014	1	0
291	1	59.0	2014	1	1
292	0	69.0	2014	1	1
293	0	46.0	2014	1	1
294	0	37.0	2014	1	0
295	0	42.0	2014	1	0
296	0	49.0	2014	1	1
297	0	57.0	2014	1	0
298	0	64.0	2014	1	0
299	0	59.0	2014	1	0
300	0	45.0	2014	1	1
301	1	71.0	2014	1	1
302	1	37.0	2014	1	0
303	0	70.0	2014	1	1
304	0	35.0	2014	1	0
305	0	50.0	2014	1	0
306	1	61.0	2014	1	0
307	0	64.0	2014	1	0
308	1	44.0	2014	1	0
309	1	35.0	2014	1	0
310	0	61.0	2014	1	0
311	0	34.0	2014	1	0
312	0	39.0	2014	1	0
313	1	28.0	2014	1	1
314	0	41.0	2014	1	0
315	0	54.0	2014	1	1
316	1	75.0	2014	1	1
317	0	45.0	2014	1	2
318	0	43.0	2014	1	0
319	0	63.0	2014	1	0
320	0	52.0	2014	1	0
321	0	42.0	2014	1	0
322	1	58.0	2014	1	0
323	1	48.0	2014	1	1
324	0	44.0	2014	1	0
325	1	75.0	2014	1	0
326	0	58.0	2014	1	1
327	0	52.0	2014	1	1
328	0	75.0	2014	1	0
329	1	79.0	2014	1	1
330	1	82.0	2014	1	0
331	1	36.0	2014	1	0
332	0	52.0	2014	1	1
333	1	81.0	2014	1	0
334	0	44.0	2014	1	0
335	0	45.0	2014	1	0
336	0	62.0	2014	1	0
337	0	47.0	2014	1	0
338	0	16.0	2014	1	0
339	0	48.0	2014	1	0
340	1	72.0	2014	1	0
341	0	39.0	2014	1	0
342	0	39.0	2014	1	1
343	0	46.0	2014	1	0
344	0	49.0	2014	1	1
345	0	42.0	2014	1	0
346	1	46.0	2014	1	0
347	0	63.0	2014	1	0
348	0	51.0	2014	1	3
349	0	40.0	2014	1	0
350	1	75.0	2014	1	0
351	1	64.0	2014	1	1
352	1	76.0	2014	1	0
353	0	68.0	2014	1	1
354	0	51.0	2014	1	0
355	1	67.0	2014	1	0
356	1	70.0	2014	1	0
357	1	79.0	2014	1	1
358	0	40.0	2014	1	0
359	0	66.0	2014	1	0
360	0	50.0	2014	1	1
361	1	56.0	2014	1	0
362	0	48.0	2014	1	0
363	1	71.0	2014	1	0
364	1	54.0	2014	1	0
365	1	48.0	2014	1	1
366	0	75.0	2014	1	0
367	0	46.0	2014	1	0
368	0	26.0	2014	1	0
369	0	73.0	2014	1	1
370	0	64.0	2014	1	0
371	0	77.0	2014	1	1
372	0	67.0	2014	1	1
373	1	67	2015	1	1
374	1	57	2015	1	0
375	0	61	2015	1	1
376	0	44	2015	1	3
377	1	80.0	2007	1	0
378	0	49.0	2007	1	0
379	0	28.0	2007	1	1
380	0	20.0	2007	1	1
381	1	66.0	2007	1	3
382	1	65.0	2007	1	0
383	0	44.0	2007	1	0
384	0	79.0	2007	1	0
385	1	65.0	2007	1	1
386	0	58.0	2007	1	0
387	1	75.0	2007	1	1
388	1	76.0	2007	1	1
389	0	65.0	2007	1	0
390	0	55.0	2007	1	0
391	0	62.0	2007	1	0
392	0	58.0	2007	1	1
393	0	72.0	2007	1	0
394	1	64.0	2007	1	0
395	0	69.0	2007	1	1
396	0	69.0	2007	1	1
397	0	65.0	2007	1	1
398	0	74.0	2007	1	0
399	0	45.0	2007	1	0
400	1	70.0	2015	1	0
401	0	65.0	2007	1	0
402	0	24.0	2007	1	0
403	0	36.0	2007	1	0
404	1	72.0	2007	1	0
405	0	57.0	2007	1	0
406	1	42.0	2007	1	0
407	0	34.0	2007	1	0
408	1	34.0	2007	1	2
409	0	41.0	2007	1	0
410	0	40.0	2007	1	0
411	0	64.0	2007	1	1
412	1	59.0	2007	1	1
413	0	40.0	2007	1	0
414	0	73.0	2007	1	1
415	1	75.0	2007	1	1
416	1	38.0	2007	1	0
417	0	70.0	2007	1	0
418	0	61.0	2007	1	0
419	1	70.0	2008	1	1
420	1	64.0	2008	1	0
421	0	39.0	2008	1	0
422	1	56.0	2008	1	0
423	1	32.0	2008	1	0
424	1	69.0	2008	1	1
425	1	44.0	2008	1	1
426	1	78.0	2008	1	0
427	0	38.0	2008	1	0
428	1	75.0	2008	1	0
429	0	66.0	2008	1	0
430	0	25.0	2008	1	2
431	1	54.0	2008	1	0
432	1	68.0	2008	1	0
433	0	49.0	2008	1	0
434	0	65.0	2008	1	0
435	0	65.0	2008	1	0
436	0	45.0	2008	1	0
437	0	52.0	2008	1	1
438	0	40.0	2008	1	0
439	0	40.0	2008	1	1
440	0	40.0	2008	1	0
441	1	67.0	2008	1	1
442	0	58.0	2008	1	0
443	1	61.0	2008	1	0
444	0	55.0	2008	1	0
445	0	50.0	2008	1	1
446	0	51.0	2008	1	0
447	0	63.0	2008	1	1
448	0	48.0	2008	1	0
449	0	45.0	2008	1	0
450	0	60.0	2008	1	0
451	0	56.0	2008	1	0
452	0	44.0	2008	1	0
453	0	21.0	2008	1	0
454	0	45.0	2008	1	0
455	1	72.0	2008	1	1
456	0	38.0	2008	1	0
457	0	53.0	2008	1	0
458	1	68.0	2008	1	0
459	1	63.0	2008	1	0
460	1	75.0	2008	1	3
461	1	35.0	2008	1	0
462	0	46.0	2008	1	0
463	0	54.0	2008	1	0
464	1	54.0	2008	1	0
465	0	63.0	2008	1	0
466	0	55.0	2008	1	1
467	0	40.0	2008	1	0
468	1	64.0	2008	1	0
469	0	38.0	2008	1	0
470	0	60.0	2008	1	0
471	1	69.0	2008	1	1
472	0	33.0	2008	1	0
473	0	32.0	2008	1	0
474	1	61.0	2008	1	2
475	1	54.0	2008	1	0
476	0	71.0	2008	1	0
477	0	64.0	2008	1	1
478	0	50.0	2008	1	0
479	0	49.0	2008	1	0
480	1	74.0	2008	1	1
481	0	64.0	2008	1	1
482	1	44.0	2008	1	0
483	0	56.0	2008	1	0
484	0	59.0	2008	1	0
485	1	31.0	2008	1	0
486	0	25.0	2008	1	0
487	0	45.0	2008	1	0
488	1	51.0	2008	1	1
489	1	68.0	2008	1	1
490	0	54.0	2008	1	0
491	0	32.0	2008	1	0
492	0	20.0	2008	1	0
493	1	61.0	2008	1	0
494	0	32.0	2008	1	2
495	0	37.0	2008	1	1
496	0	56.0	2008	1	0
497	0	40.0	2008	1	0
498	0	56.0	2008	1	0
499	0	44.0	2008	1	0
500	0	71.0	2008	1	1
501	1	59.0	2008	1	0
502	0	51.0	2008	1	0
503	0	36.0	2008	1	0
504	1	72.0	2008	1	1
505	0	40.0	2008	1	0
506	1	66.0	2008	1	1
507	0	50.0	2008	1	1
508	1	72.0	2008	1	0
509	1	67.0	2008	1	1
510	0	46.0	2008	1	0
511	1	71.0	2008	1	0
512	0	52.0	2008	1	0
513	1	89.0	2008	1	0
514	0	68.0	2008	1	1
515	1	71.0	2008	1	1
516	1	67.0	2008	1	1
517	0	33.0	2008	1	0
518	0	61.0	2008	1	0
519	1	57.0	2008	1	0
520	0	61.0	2008	1	1
521	1	67.0	2008	1	1
522	0	61	2015	1	3
523	1	60	2015	1	3
524	0	46	2015	1	0
525	1	67	2015	1	1
526	1	51	2015	1	3
527	1	75	2015	1	1
528	0	50	2015	1	1
529	0	46	2015	1	0
530	1	61	2015	1	1
531	0	74	2015	1	1
532	0	52	2015	1	1
533	0	64	2015	1	1
534	1	66	2015	1	0
535	0	73	2015	1	0
536	0	73.0	2006	1	1
537	0	48.0	2006	1	0
538	0	65.0	2006	1	3
539	0	34.0	2006	1	0
540	1	73.0	2006	1	1
541	0	73.0	2006	1	1
542	1	62.0	2006	1	1
543	0	71.0	2006	1	1
544	0	31.0	2006	1	0
545	1	65.0	2006	1	0
546	0	47.0	2006	1	0
547	1	59.0	2006	1	0
548	0	84.0	2006	1	1
549	1	71.0	2006	1	0
550	0	69.0	2006	1	0
551	0	44.0	2006	1	0
552	0	32.0	2006	1	0
553	1	49.0	2006	1	0
554	0	37.0	2006	1	0
555	1	41.0	2006	1	0
556	1	68.0	2006	1	0
557	0	48.0	2006	1	0
558	0	73.0	2006	1	0
559	1	72.0	2006	1	1
560	0	39.0	2007	1	0
561	1	31.0	2007	1	2
562	0	77.0	2007	1	0
563	0	62.0	2007	1	0
564	0	52.0	2007	1	0
565	0	50.0	2007	1	0
566	1	72.0	2007	1	0
567	0	52.0	2007	1	0
568	1	89.0	2007	1	1
569	0	42.0	2007	1	0
570	0	47.0	2007	1	0
571	1	36.0	2007	1	0
572	0	50.0	2007	1	0
573	0	49.0	2007	1	0
574	0	29.0	2007	1	0
575	0	69.0	2007	1	1
576	1	45.0	2007	1	0
577	0	37.0	2007	1	0
578	0	53.0	2007	1	0
579	0	55.0	2007	1	0
580	1	35.0	2007	1	0
581	0	53.0	2007	1	0
582	1	63.0	2007	1	1
583	0	37.0	2007	1	2
584	0	25.0	2007	1	0
585	1	35.0	2007	1	1
586	1	71.0	2007	1	0
587	1	62.0	2007	1	1
588	0	36.0	2007	1	0
589	0	34.0	2007	1	0
590	0	67.0	2007	1	0
591	0	53.0	2007	1	0
592	0	34.0	2007	1	0
593	0	70.0	2007	1	0
594	0	60.0	2007	1	0
595	1	74.0	2007	1	1
596	0	52.0	2007	1	0
597	1	68.0	2007	1	1
598	1	79.0	2007	1	1
599	0	37.0	2007	1	0
600	0	43.0	2007	1	2
601	0	40.0	2007	1	1
602	0	49.0	2007	1	0
603	1	52.0	2007	1	0
604	1	54.0	2007	1	0
605	1	61.0	2007	1	0
606	0	45.0	2007	1	0
607	0	70.0	2007	1	0
608	0	53.0	2007	1	0
609	0	67.0	2007	1	1
610	0	35.0	2007	1	2
611	1	76.0	2007	1	1
612	0	46.0	2007	1	0
613	0	18.0	2007	1	0
614	0	48.0	2007	1	0
615	0	65.0	2007	1	0
616	1	67.0	2007	1	0
617	1	64.0	2007	1	0
618	1	79.0	2007	1	1
619	0	50.0	2007	1	0
620	0	67.0	2007	1	1
621	0	73.0	2007	1	1
622	0	40.0	2007	1	0
623	1	81.0	2007	1	1
624	1	68.0	2007	1	1
625	1	55.0	2007	1	1
626	0	73.0	2007	1	0
627	1	54.0	2007	1	1
628	1	40.0	2007	1	0
629	0	33.0	2007	1	0
630	0	80.0	2007	1	2
631	0	85.0	2007	1	0
632	1	74.0	2007	1	1
633	0	64.0	2007	1	0
634	0	44.0	2007	1	0
635	0	33.0	2007	1	0
636	0	45.0	2007	1	1
637	0	71.0	2007	1	0
638	0	76.0	2007	1	0
639	0	73.0	2007	1	1
640	0	42.0	2007	1	1
641	0	74.0	2007	1	1
642	0	41.0	2007	1	1
643	0	42.0	2007	1	0
644	1	64.0	2007	1	1
645	0	66.0	2007	1	1
646	1	63.0	2007	1	1
647	0	43.0	2007	1	1
648	0	50.0	2007	1	1
649	0	28.0	2007	1	0
650	0	43.0	2007	1	1
651	0	55.0	2007	1	0
652	0	55.0	2007	1	0
653	1	72.0	2007	1	0
654	0	49.0	2007	1	1
655	1	69.0	2007	1	0
656	0	64.0	2007	1	1
657	0	63.0	2007	1	0
658	1	74.0	2007	1	0
659	0	25.0	2007	1	0
660	0	58.0	2007	1	0
661	0	18.0	2007	1	0
662	0	66.0	2007	1	1
663	0	40.0	2007	1	0
664	0	44.0	2007	1	0
665	1	54.0	2007	1	0
666	0	46.0	2007	1	0
667	0	54.0	2007	1	1
668	0	78.0	2007	1	0
669	1	60.0	2007	1	0
670	0	64.0	2007	1	0
671	0	79.0	2007	1	1
672	0	45.0	2007	1	0
673	0	78.0	2007	1	1
674	1	73.0	2007	1	0
675	1	50.0	2007	1	1
676	0	23.0	2007	1	0
677	1	70.0	2007	1	0
678	1	53.0	2007	1	0
679	0	57.0	2007	1	1
680	1	32.0	2007	1	0
681	1	50.0	2007	1	1
682	0	55.0	2007	1	0
683	1	58.0	2007	1	0
684	1	78.0	2007	1	1
685	0	58.0	2007	1	1
686	0	40.0	2007	1	0
687	0	53.0	2007	1	1
688	0	73.0	2007	1	0
689	1	78.0	2007	1	0
690	1	70	2014	1	0
691	1	33	2014	1	1
692	0	76	2014	1	0
693	1	38	2014	1	1
694	1	62	2014	1	1
695	1	78	2014	1	3
696	0	57	2014	1	0
697	1	63	2015	1	1
698	1	68	2015	1	1
699	1	48	2015	1	1
700	1	42	2015	1	0
701	0	39.0	2005	1	1
702	0	29.0	2005	1	0
703	1	35.0	2005	1	0
704	0	48.0	2005	1	0
705	1	63.0	2005	1	1
706	0	73.0	2005	1	0
707	0	56.0	2005	1	0
708	0	40.0	2005	1	1
709	0	43.0	2005	1	0
710	0	62.0	2005	1	1
711	0	65.0	2005	1	0
712	0	36.0	2005	1	0
713	0	20.0	2005	1	0
714	1	41.0	2005	1	0
715	0	42.0	2005	1	0
716	0	36.0	2005	1	0
717	1	66.0	2005	1	0
718	0	39.0	2005	1	1
719	0	51.0	2005	1	0
720	0	50.0	2005	1	2
721	0	60.0	2005	1	0
722	0	36.0	2005	1	0
723	0	70.0	2005	1	0
724	1	80.0	2005	1	1
725	1	63.0	2005	1	0
726	0	70.0	2005	1	0
727	0	54.0	2005	1	1
728	1	40.0	2005	1	0
729	0	34.0	2005	1	0
730	1	22.0	2005	1	0
731	0	67.0	2005	1	0
732	1	50.0	2005	1	2
733	0	41.0	2005	1	0
734	0	72.0	2005	1	0
735	0	19.0	2005	1	0
736	1	66.0	2005	1	0
737	0	34.0	2005	1	0
738	0	61.0	2005	1	0
739	0	70.0	2005	1	0
740	0	40.0	2005	1	0
741	0	69.0	2005	1	0
742	1	72.0	2005	1	0
743	1	35.0	2005	1	0
744	0	24.0	2005	1	0
745	1	59.0	2005	1	0
746	0	42.0	2005	1	0
747	0	43.0	2005	1	0
748	0	51.0	2005	1	0
749	0	16.0	2005	1	0
750	1	73.0	2005	1	1
751	0	55.0	2005	1	1
752	0	47.0	2005	1	3
753	1	39.0	2005	1	0
754	1	67.0	2005	1	0
755	0	54.0	2005	1	0
756	0	42.0	2005	1	0
757	0	57.0	2005	1	0
758	1	83.0	2005	1	0
759	0	47.0	2005	1	0
760	0	65.0	2005	1	3
761	1	61.0	2005	1	0
762	0	41.0	2005	1	0
763	0	41.0	2005	1	0
764	0	36.0	2005	1	0
765	1	66.0	2005	1	1
766	0	59.0	2005	1	1
767	1	29.0	2005	1	0
768	1	40.0	2005	1	0
769	0	70.0	2005	1	0
770	1	78.0	2005	1	0
771	0	59.0	2005	1	1
772	0	60.0	2005	1	0
773	1	42.0	2005	1	0
774	0	66.0	2005	1	0
775	0	24.0	2005	1	0
776	0	57.0	2005	1	0
777	1	72.0	2005	1	0
778	0	50.0	2005	1	0
779	0	42.0	2005	1	1
780	1	69.0	2005	1	3
781	0	44.0	2005	1	0
782	0	45.0	2006	1	1
783	0	71.0	2006	1	0
784	0	60.0	2006	1	0
785	0	85.0	2006	1	0
786	0	50.0	2006	1	0
787	0	52.0	2006	1	0
788	1	66.0	2006	1	1
789	1	49.0	2006	1	1
790	1	66.0	2006	1	0
791	0	71.0	2006	1	0
792	1	45.0	2006	1	1
793	1	82.0	2006	1	0
794	0	62.0	2006	1	0
795	1	56.0	2006	1	1
796	0	40.0	2006	1	0
797	0	58.0	2006	1	0
798	0	59.0	2006	1	1
799	1	61.0	2006	1	1
800	1	67.0	2006	1	2
801	0	47.0	2006	1	0
802	1	72.0	2006	1	1
803	0	76.0	2006	1	0
804	1	58.0	2006	1	0
805	0	40.0	2006	1	0
806	1	30.0	2006	1	0
807	0	40.0	2006	1	0
808	0	62.0	2006	1	1
809	1	76.0	2006	1	1
810	1	26.0	2006	1	2
811	0	61.0	2006	1	0
812	0	54.0	2006	1	0
813	1	72.0	2006	1	0
814	1	76.0	2006	1	0
815	0	24.0	2006	1	0
816	0	47.0	2006	1	0
817	0	64.0	2006	1	1
818	0	37.0	2006	1	0
819	1	78.0	2006	1	1
820	1	24.0	2006	1	0
821	1	80.0	2006	1	0
822	0	43.0	2006	1	0
823	0	52.0	2006	1	1
824	0	56.0	2006	1	0
825	0	55.0	2006	1	0
826	0	44.0	2006	1	2
827	1	47.0	2006	1	1
828	0	46.0	2006	1	0
829	1	54.0	2006	1	0
830	1	67.0	2006	1	0
831	1	50.0	2006	1	0
832	1	58.0	2006	1	2
833	0	59.0	2006	1	0
834	1	51.0	2006	1	0
835	1	61.0	2006	1	0
836	1	77.0	2006	1	0
837	1	54.0	2006	1	1
838	0	67.0	2006	1	0
839	1	58.0	2006	1	1
840	0	58.0	2006	1	0
841	0	71.0	2006	1	0
842	1	79.0	2006	1	1
843	0	65.0	2006	1	0
844	1	79.0	2006	1	0
845	1	68.0	2006	1	0
846	0	69.0	2006	1	0
847	0	53.0	2006	1	0
848	1	65.0	2006	1	0
849	0	43.0	2006	1	0
850	0	64.0	2006	1	0
851	0	56.0	2006	1	0
852	1	75.0	2006	1	0
853	1	81.0	2006	1	1
854	0	22.0	2006	1	0
855	0	53.0	2006	1	0
856	1	63.0	2006	1	0
857	0	31.0	2006	1	0
858	0	70.0	2006	1	0
859	1	37.0	2006	1	0
860	1	66.0	2006	1	1
861	0	19.0	2006	1	0
862	0	37.0	2006	1	0
863	1	38.0	2006	1	0
864	1	70.0	2006	1	0
865	0	67.0	2006	1	0
866	0	40.0	2006	1	0
867	1	55.0	2006	1	1
868	0	78.0	2006	1	1
869	0	57.0	2006	1	0
870	1	64.0	2006	1	0
871	1	60.0	2006	1	2
872	1	63.0	2006	1	0
873	0	56.0	2006	1	1
874	1	51.0	2006	1	1
875	0	73.0	2006	1	0
876	0	65.0	2006	1	1
877	0	41.0	2006	1	0
878	0	38.0	2006	1	0
879	1	56.0	2006	1	3
880	0	22.0	2006	1	0
881	0	25.0	2006	1	0
882	1	41.0	2006	1	0
883	0	42.0	2006	1	1
884	0	48.0	2006	1	0
885	0	61.0	2006	1	0
886	1	75.0	2006	1	0
887	0	41.0	2006	1	0
888	0	41.0	2006	1	0
889	1	35.0	2006	1	0
890	0	41.0	2006	1	0
891	0	51.0	2006	1	0
892	1	72.0	2006	1	0
893	0	29.0	2006	1	0
894	0	72.0	2006	1	1
895	0	53.0	2006	1	1
896	0	58.0	2006	1	1
897	0	37.0	2006	1	0
898	1	69.0	2006	1	0
899	0	79.0	2006	1	0
900	1	52.0	2006	1	1
901	1	67.0	2006	1	1
902	0	38.0	2006	1	0
903	0	69.0	2006	1	0
904	1	57.0	2006	1	0
905	0	58.0	2006	1	0
906	0	75.0	2006	1	1
907	0	42.0	2006	1	0
908	0	48.0	2006	1	0
909	0	48.0	2006	1	0
910	0	40.0	2006	1	0
911	0	70.0	2006	1	1
912	1	45.0	2006	1	1
913	0	54.0	2006	1	1
914	0	54.0	2006	1	0
915	0	74.0	2006	1	1
916	0	66.0	2006	1	0
917	0	32.0	2006	1	1
918	0	44.0	2006	1	0
919	1	49.0	2006	1	0
920	0	51.0	2006	1	1
921	0	42.0	2006	1	0
922	0	60.0	2006	1	1
923	0	35.0	2006	1	0
924	0	49.0	2006	1	0
925	1	77.0	2006	1	1
926	0	68.0	2006	1	0
927	0	64.0	2006	1	1
928	0	47.0	2006	1	0
929	1	60.0	2006	1	0
930	0	60.0	2006	1	0
931	0	44.0	2006	1	0
932	0	43.0	2006	1	0
933	0	43.0	2006	1	0
934	0	51.0	2006	1	0
935	0	39.0	2006	1	0
936	1	43.0	2006	1	1
937	1	71.0	2006	1	1
938	1	60.0	2006	1	1
939	0	34.0	2006	1	0
940	0	36.0	2006	1	0
941	1	78.0	2006	1	0
942	0	59.0	2006	1	0
943	0	74.0	2015	1	1
944	1	76.0	2015	1	1
945	1	80.0	2007	1	1
946	1	61.0	2007	1	0
947	0	71.0	2007	1	1
948	1	71.0	2013	1	1
949	0	71.0	2010	1	3
950	1	37.0	2014	1	0
951	1	77.0	2014	1	1
952	1	50.0	2014	1	1
953	1	76.0	2015	1	1
954	1	63.0	2015	1	1
955	1	63.0	2015	1	0
956	1	50.0	2015	1	1
957	1	68.0	2015	1	0
958	0	68.0	2015	1	0
959	0	47.0	2015	1	0
960	0	58.0	2015	1	1
961	1	72.0	2015	1	1
962	1	59.0	2015	1	1
963	1	79.0	2015	1	1
964	1	53.0	2015	1	1
965	1	80.0	2015	1	0
966	1	52.0	2015	1	1
967	0	34.0	2015	1	0
968	0	50.0	2015	1	0
969	1	64.0	2013	1	1
970	0	50.0	2013	1	0
971	1	43.0	2013	1	0
972	1	88.0	2016	1	3
973	1	70.0	2016	1	1
974	0	47.0	2016	1	0
975	0	56.0	2016	1	1
976	0	59.0	2016	1	0
977	0	74.0	2016	1	1
978	1	89.0	2016	1	1
979	1	45.0	2016	1	2
980	1	75.0	2016	1	1
981	0	73.0	2016	1	1
982	0	59.0	2016	1	1
983	1	62.0	2016	1	1
984	0	64.0	2016	1	0
985	1	70.0	2016	1	1
986	0	44.0	2016	1	0
987	1	83.0	2016	1	1
988	1	53.0	2016	1	1
989	1	82.0	2016	1	1
990	0	77.0	2016	1	0
991	0	62.0	2016	1	0
992	1	54.0	2016	1	1
993	0	69.0	2016	1	1
994	1	69.0	2016	1	1
995	1	69.0	2016	1	1
996	0	57.0	2016	1	0
997	1	60.0	2016	1	0
998	0	68.0	2016	1	0
999	1	83.0	2016	1	1
1000	0	20.0	2016	1	0
1001	1	42.0	2016	1	2
1002	0	68.0	2016	1	1
1003	1	66.0	2016	1	1
1004	0	61.0	2016	1	1
1005	1	62.0	2016	1	1
1006	0	51.0	2016	1	1
1007	0	62.0	2016	1	0
1008	1	81.0	2016	1	1
1009	1	81.0	2016	1	1
1010	0	72.0	2016	1	1
1011	0	48.0	2016	1	1
1012	0	49	2012	1	0
1013	1	59	2012	1	1
1014	0	41	2012	1	0
1015	1	52	2012	1	0
1016	0	51	2012	1	1
1017	1	80	2012	1	1
1018	0	56	2012	1	0
1019	0	46	2012	1	1
1020	0	64	2012	1	3
1021	0	64	2013	1	1,3
1022	0	58	2013	1	0
1023	1	70	2013	1	1
1024	1	64	2013	1	0
1025	0	71	2013	1	1
1026	1	58	2013	1	0
1027	0	51	2013	1	0
1028	0	42	2013	1	1
1029	0	71	2013	1	4
1030	1	54	2013	1	1
1031	1	57	2013	1	1
1032	0	61	2013	1	4
1033	0	61	2013	1	0
1034	0	65	2013	1	1
1035	1	67	2013	1	1
1036	0	62	2013	1	1
1037	0	74	2013	1	1
1038	1	54	2013	1	1
1039	1	65	2013	1	1
1040	0	38	2013	1	0
1041	0	68	2014	1	1
1042	0	52	2014	1	0
1043	0	73	2014	1	1
1044	1	58	2014	1	1
1045	1	54	2014	1	1
1046	1	50	2014	1	1
1047	0	49	2014	1	3
1048	0	51	2014	1	1
1049	0	48	2014	1	0
1050	0	59	2014	1	1
1051	1	50	2014	1	1
1052	1	77	2014	1	0
1053	1	80	2014	1	1
1054	1	49	2014	1	3
1055	0	63	2014	1	0
1056	1	46	2014	1	0
1057	1	63	2014	1	1
1058	0	34	2014	1	0
1059	0	48.0	2015	1	0
1060	0	45.0	2015	1	0
1061	0	44.0	2014	1	0
1062	1	22.0	2016	1	1
1063	0	58.0	2009	1	0
1064	0	66.0	2009	1	1
1065	0	33.0	2009	1	0
1066	1	56.0	2009	1	0
1067	0	38.0	2009	1	0
1068	0	38.0	2009	1	0
1069	1	56.0	2009	1	0
1070	1	67.0	2009	1	1
1071	1	72.0	2009	1	1
1072	0	60.0	2009	1	0
1073	0	45.0	2009	1	1
1074	0	75.0	2009	1	1
1075	0	40.0	2009	1	0
1076	0	72.0	2009	1	1
1077	0	67.0	2009	1	0
1078	1	61.0	2009	1	2
1079	1	70.0	2009	1	0
1080	1	52.0	2009	1	0
1081	0	50.0	2009	1	0
1082	1	55.0	2009	1	0
1083	1	65.0	2009	1	0
1084	0	39.0	2009	1	0
1085	0	48.0	2009	1	0
1086	0	77.0	2009	1	0
1087	1	62.0	2009	1	0
1088	1	66.0	2009	1	0
1089	0	39.0	2009	1	0
1090	1	71.0	2009	1	0
1091	0	62.0	2009	1	0
1092	0	24.0	2009	1	0
1093	0	45.0	2009	1	0
1094	1	35.0	2009	1	1
1095	1	55.0	2009	1	0
1096	1	37.0	2009	1	0
1097	0	20.0	2009	1	0
1098	0	45.0	2009	1	3
1099	1	51.0	2009	1	2
1100	1	61.0	2009	1	3
1101	0	70.0	2009	1	0
1102	0	56.0	2009	1	1
1103	0	45.0	2009	1	0
1104	0	76.0	2009	1	1
1105	1	69.0	2009	1	1
1106	1	63.0	2009	1	1
1107	1	59.0	2009	1	0
1108	1	76.0	2009	1	0
1109	1	77.0	2009	1	33
1110	0	43.0	2009	1	0
1111	0	57.0	2009	1	0
1112	0	53.0	2009	1	0
1113	0	39.0	2009	1	0
1114	1	79.0	2009	1	0
1115	0	41.0	2009	1	0
1116	0	39.0	2009	1	0
1117	0	68.0	2009	1	1
1118	1	77.0	2009	1	0
1119	1	66.0	2009	1	0
1120	0	57.0	2009	1	0
1121	0	39.0	2009	1	0
1122	0	58.0	2010	1	2
1123	1	68.0	2010	1	1
1124	1	55.0	2010	1	1
1125	0	23.0	2010	1	0
1126	0	59.0	2010	1	1
1127	1	43.0	2010	1	0
1128	0	35.0	2010	1	1
1129	0	54.0	2010	1	1
1130	0	70.0	2010	1	0
1131	1	56.0	2010	1	1
1132	1	56.0	2010	1	1
1133	1	79.0	2010	1	0
1134	0	47.0	2010	1	0
1135	1	45.0	2010	1	0
1136	0	62.0	2010	1	0
1137	1	46.0	2010	1	1
1138	0	53.0	2010	1	1
1139	1	68.0	2010	1	1
1140	0	33.0	2010	1	1
1141	0	38.0	2010	1	0
1142	0	33.0	2010	1	0
1143	1	55.0	2010	1	0
1144	1	39.0	2010	1	0
1145	0	69.0	2010	1	0
1146	0	72.0	2010	1	1
1147	0	56.0	2010	1	0
1148	0	43.0	2010	1	0
1149	1	78.0	2010	1	1
1150	0	52.0	2010	1	1
1151	0	49.0	2010	1	0
1152	1	46.0	2010	1	0
1153	0	69.0	2010	1	1
1154	0	72.0	2010	1	0
1155	1	68.0	2010	1	0
1156	0	69.0	2010	1	1
1157	1	74.0	2010	1	1
1158	1	59.0	2010	1	1
1159	0	41.0	2010	1	0
1160	1	89.0	2010	1	0
1161	0	55.0	2010	1	1
1162	0	59.0	2010	1	0
1163	1	56.0	2010	1	0
1164	0	45.0	2010	1	0
1165	0	49.0	2010	1	0
1166	1	72.0	2010	1	0
1167	1	81.0	2010	1	0
1168	0	82.0	2010	1	0
1169	0	76.0	2010	1	0
1170	1	73.0	2010	1	1
1171	0	77.0	2010	1	3
1172	0	55.0	2010	1	0
1173	1	76.0	2010	1	0
1174	1	82.0	2010	1	0
1175	0	40.0	2010	1	0
1176	0	66.0	2010	1	0
1177	0	72.0	2010	1	2
1178	0	63.0	2010	1	1
1179	0	58.0	2010	1	0
1180	0	35.0	2010	1	2
1181	0	54.0	2010	1	0
1182	1	71.0	2010	1	1
1183	1	64.0	2010	1	0
1184	0	35.0	2010	1	0
1185	1	81.0	2010	1	1
1186	1	71.0	2010	1	1
1187	0	69.0	2010	1	0
1188	0	52.0	2010	1	0
1189	1	66.0	2010	1	1
1190	1	81.0	2010	1	1
1191	1	45.0	2010	1	1
1192	0	70.0	2010	1	1
1193	1	66.0	2010	1	1
1194	0	75.0	2010	1	0
1195	0	58.0	2010	1	2
1196	1	74.0	2010	1	0
1197	0	39.0	2010	1	0
1198	0	43.0	2010	1	0
1199	1	74.0	2010	1	0
1200	0	76.0	2010	1	1
1201	0	67.0	2010	1	0
1202	1	41.0	2010	1	0
1203	0	61.0	2010	1	0
1204	1	61.0	2010	1	0
1205	1	62.0	2010	1	0
1206	0	40.0	2010	1	0
1207	1	39.0	2010	1	0
1208	0	77.0	2010	1	0
1209	0	63.0	2010	1	0
1210	0	74.0	2010	1	0
1211	0	38.0	2010	1	1
1212	0	48.0	2010	1	0
1213	0	69.0	2010	1	1
1214	1	64.0	2010	1	0
1215	0	63.0	2010	1	1
1216	0	66.0	2010	1	0
1217	0	74.0	2010	1	1
1218	0	60.0	2010	1	0
1219	0	38.0	2010	1	0
1220	0	48.0	2010	1	0
1221	0	43.0	2010	1	0
1222	1	65.0	2010	1	0
1223	0	47.0	2010	1	0
1224	1	63.0	2010	1	0
1225	0	56.0	2010	1	0
1226	0	31.0	2010	1	0
1227	1	41.0	2010	1	0
1228	1	41.0	2010	1	2
1229	1	51.0	2010	1	0
1230	0	71.0	2010	1	1
1231	1	83.0	2010	1	1
1232	1	62.0	2010	1	0
1233	0	55.0	2010	1	0
1234	1	67.0	2010	1	0
1235	1	55.0	2010	1	1
1236	0	65.0	2010	1	0
1237	0	70.0	2010	1	1
1238	0	68.0	2010	1	0
1239	0	55.0	2010	1	0
1240	0	23.0	2010	1	0
1241	1	47.0	2010	1	2
1242	0	25.0	2010	1	0
1243	0	48.0	2010	1	1
1244	0	38.0	2010	1	0
1245	0	26.0	2010	1	0
1246	0	58.0	2010	1	0
1247	0	70.0	2010	1	0
1248	0	68.0	2010	1	0
1249	1	80.0	2010	1	1
1250	0	59.0	2010	1	0
1251	0	25.0	2010	1	1
1252	1	80.0	2010	1	1
1253	1	67.0	2010	1	0
1254	1	62.0	2010	1	0
1255	1	78.0	2010	1	0
1256	0	40.0	2010	1	0
1257	0	42.0	2010	1	0
1258	1	56.0	2010	1	1
1259	1	68.0	2010	1	0
1260	0	68.0	2010	1	0
1261	0	59.0	2010	1	1
1262	0	27.0	2010	1	0
1263	0	42.0	2010	1	0
1264	0	40.0	2010	1	0
1265	0	66.0	2010	1	1
1266	0	37.0	2010	1	1
1267	1	68.0	2010	1	2
1268	0	77.0	2010	1	1
1269	1	67.0	2010	1	1
1270	0	77.0	2010	1	1
1271	0	80.0	2010	1	0
1272	0	54.0	2010	1	0
1273	0	61.0	2010	1	0
1274	1	43.0	2010	1	1
1275	0	46.0	2010	1	0
1276	0	77.0	2010	1	1
1277	1	61.0	2010	1	0
1278	0	63.0	2010	1	2
1279	1	63.0	2010	1	0
1280	0	64.0	2010	1	0
1281	0	55.0	2010	1	0
1282	0	55.0	2010	1	1
1283	1	56.0	2010	1	1
1284	1	48.0	2010	1	1
1285	0	77.0	2010	1	1
1286	0	36.0	2010	1	0
1287	0	46.0	2010	1	1
1288	0	64.0	2010	1	2
1289	0	59.0	2010	1	0
1290	0	57.0	2010	1	1
1291	0	57.0	2010	1	1
1292	0	44.0	2010	1	0
1293	1	88.0	2010	1	1
1294	1	37.0	2010	1	0
1295	0	54.0	2010	1	0
1296	0	63.0	2010	1	0
1297	0	51.0	2010	1	1
1298	0	53.0	2010	1	0
1299	1	77.0	2010	1	0
1300	1	77.0	2010	1	0
1301	0	40.0	2010	1	0
1302	1	63.0	2010	1	0
1303	0	64.0	2010	1	1
1304	1	63.0	2010	1	0
1305	0	24.0	2010	1	0
1306	1	79.0	2010	1	1
1307	0	40.0	2010	1	0
1308	1	81.0	2010	1	1
1309	1	58.0	2010	1	1
1310	1	66.0	2010	1	1
1311	1	67.0	2010	1	0
1312	1	41.0	2010	1	0
1313	0	47.0	2010	1	0
1314	0	42.0	2010	1	0
1315	1	70.0	2010	1	0
1316	1	76.0	2010	1	1
1317	0	43.0	2010	1	0
1318	0	47.0	2010	1	1
1319	0	67.0	2010	1	1
1320	0	57.0	2010	1	1
1321	0	47.0	2010	1	1
1322	0	73.0	2010	1	1
1323	1	73.0	2010	1	0
1324	1	52.0	2010	1	0
1325	0	52.0	2010	1	1
1326	1	61.0	2010	1	0
1327	0	47.0	2010	1	1
1328	0	57.0	2010	1	1
1329	0	49.0	2010	1	1
1330	0	52.0	2010	1	0
1331	0	72.0	2010	1	1
1332	1	61.0	2010	1	0
1333	1	77.0	2010	1	1
1334	1	63.0	2010	1	3
1335	0	63.0	2010	1	1
1336	0	34.0	2010	1	0
1337	0	41.0	2010	1	0
1338	0	47.0	2010	1	0
1339	1	57.0	2010	1	2
1340	0	78.0	2010	1	0
1341	1	36.0	2010	1	0
1342	1	77.0	2010	1	1
1343	0	42.0	2010	1	0
1344	0	69.0	2010	1	1
1345	0	79.0	2010	1	0
1346	0	55.0	2010	1	0
1347	0	62.0	2005	1	0
1348	0	47.0	2005	1	1
1349	0	39.0	2005	1	0
1350	1	32.0	2005	1	0
1351	0	39.0	2005	1	0
1352	0	65.0	2005	1	0
1353	0	67.0	2005	1	0
1354	1	68.0	2005	1	0
1355	1	42.0	2005	1	0
1356	0	40.0	2005	1	0
1357	0	70.0	2005	1	0
1358	0	84.0	2005	1	0
1359	0	28.0	2005	1	0
1360	0	62.0	2005	1	2
1361	1	23.0	2005	1	2
1362	1	69.0	2005	1	1
1363	0	39.0	2005	1	0
1364	0	68.0	2005	1	1
1365	0	50.0	2005	1	0
1366	0	52.0	2005	1	0
1367	1	67.0	2005	1	2
1368	1	77.0	2005	1	0
1369	1	65.0	2005	1	0
1370	1	36.0	2005	1	2
1371	0	36.0	2005	1	0
1372	0	19.0	2005	1	0
1373	0	64.0	2005	1	1
1374	1	83.0	2005	1	0
1375	0	50.0	2005	1	0
1376	0	39.0	2005	1	0
1377	1	77.0	2005	1	1
1378	1	49.0	2005	1	0
1379	1	33.0	2005	1	0
1380	0	47.0	2005	1	0
1381	0	41.0	2005	1	0
1382	1	55.0	2005	1	1
1383	0	57.0	2005	1	0
1384	0	33.0	2005	1	0
1385	0	25.0	2005	1	0
1386	0	48.0	2005	1	0
1387	0	58.0	2005	1	2
1388	1	50.0	2005	1	0
1389	0	57.0	2014	1	1
1390	1	82.0	2014	1	1
1391	1	71.0	2014	1	1
1392	0	62.0	2014	1	1
1393	1	72.0	2014	1	0
1394	1	68.0	2014	1	1
1395	1	83.0	2014	1	1
1396	1	46.0	2014	1	1
1397	0	58.0	2015	1	1
1398	0	61.0	2016	1	0
1399	0	53.0	2016	1	0
1400	1	65.0	2010	1	0
1401	0	54.0	2015	1	3
1402	0	59	2014	1	0
1403	1	45	2014	1	1
1404	0	75	2014	1	0
1405	0	52	2014	1	1
1406	0	69	2014	1	1
1407	1	62	2014	1	1
1408	0	49	2014	1	0
1409	0	47	2014	1	0
1410	0	45	2016	1	0
1411	1	63	2016	1	0
1412	0	81	2016	1	4
1413	0	69	2016	1	0
1414	0	80	2016	1	1
1415	0	52	2016	1	0
1416	1	63	2016	1	1
1417	0	53	2016	1	1
1418	1	28	2016	1	1
1419	1	63	2016	1	1
1420	0	59	2015	1	0
1421	0	49	2015	1	0
1422	1	58	2015	1	0
1423	1	43	2015	1	0
1424	0	36	2015	1	0
1425	0	47	2015	1	3
1426	0	29	2015	1	1
1427	0	42	2015	1	0
1428	0	47	2015	1	0
1429	0	79	2015	1	0
1430	1	70	2015	1	1
1431	0	70	2015	1	1
1432	1	78	2015	1	1
1433	1	78	2015	1	1
1434	1	60	2015	1	1
1435	0	52	2015	1	0
1436	1	74	2015	1	0
1437	1	41	2015	1	0
1438	0	16	2015	1	0
1439	1	80	2015	1	1
1440	1	57	2013	1	0
1441	0	58.0	2011	1	0
1442	0	38.0	2011	1	0
1443	1	74.0	2011	1	0
1444	0	62.0	2011	1	0
1445	0	31.0	2011	1	0
1446	0	72.0	2011	1	2
1447	0	44.0	2011	1	0
1448	1	74.0	2011	1	1
1449	0	70.0	2011	1	0
1450	0	68.0	2011	1	0
1451	0	38.0	2011	1	0
1452	1	55.0	2011	1	1
1453	1	60.0	2011	1	0
1454	1	70.0	2011	1	1
1455	0	72.0	2011	1	0
1456	0	35.0	2011	1	0
1457	0	55.0	2011	1	0
1458	0	38.0	2011	1	0
1459	1	43.0	2011	1	0
1460	1	64.0	2011	1	0
1461	0	60.0	2011	1	2
1462	0	71.0	2011	1	0
1463	0	50.0	2011	1	0
1464	1	79.0	2011	1	1
1465	1	40.0	2011	1	0
1466	1	62.0	2011	1	1
1467	1	39.0	2011	1	0
1468	1	64.0	2011	1	1
1469	0	45.0	2011	1	0
1470	0	60.0	2011	1	0
1471	0	62.0	2011	1	0
1472	0	64.0	2011	1	1
1473	0	56.0	2011	1	1
1474	0	60.0	2011	1	1
1475	0	48.0	2011	1	0
1476	0	75.0	2011	1	0
1477	1	77.0	2011	1	0
1478	1	66.0	2011	1	0
1479	1	47.0	2011	1	0
1480	1	60.0	2011	1	1
1481	1	70.0	2011	1	1
1482	0	52.0	2011	1	0
1483	0	56.0	2011	1	1
1484	0	80.0	2011	1	0
1485	0	46.0	2011	1	0
1486	1	68.0	2011	1	1
1487	0	55.0	2011	1	0
1488	1	79.0	2011	1	0
1489	0	46.0	2011	1	1
1490	1	74.0	2011	1	0
1491	1	60.0	2011	1	1
1492	0	73.0	2011	1	1
1493	0	58.0	2011	1	0
1494	0	49.0	2011	1	1
1495	0	56.0	2011	1	0
1496	1	45.0	2011	1	0
1497	1	71.0	2011	1	1
1498	0	26.0	2011	1	0
1499	1	73.0	2011	1	1
1500	0	45.0	2011	1	0
1501	0	60.0	2011	1	1
1502	0	41.0	2011	1	0
1503	0	38.0	2011	1	0
1504	0	70.0	2011	1	1
1505	0	38.0	2011	1	0
1506	1	33.0	2011	1	0
1507	0	58.0	2011	1	0
1508	1	59.0	2011	1	0
1509	0	66.0	2011	1	0
1510	0	46.0	2011	1	1
1511	1	56.0	2011	1	0
1512	0	58.0	2011	1	0
1513	1	82.0	2011	1	1
1514	0	65.0	2011	1	1
1515	0	39.0	2011	1	0
1516	0	37.0	2011	1	0
1517	0	65.0	2011	1	1
1518	0	41.0	2011	1	0
1519	1	77.0	2011	1	1
1520	0	47.0	2011	1	1
1521	1	61.0	2011	1	0
1522	1	65.0	2011	1	0
1523	0	53.0	2011	1	0
1524	0	57.0	2011	1	0
1525	1	81.0	2011	1	0
1526	0	65.0	2011	1	1
1527	1	77.0	2011	1	0
1528	0	27.0	2011	1	0
1529	1	35.0	2011	1	1
1530	0	52.0	2011	1	0
1531	1	70.0	2011	1	0
1532	0	37.0	2011	1	0
1533	0	77.0	2011	1	1
1534	1	69.0	2011	1	1
1535	0	70.0	2011	1	1
1536	0	58.0	2011	1	0
1537	0	68.0	2011	1	0
1538	1	27.0	2011	1	0
1539	0	50.0	2011	1	0
1540	0	69.0	2011	1	0
1541	0	41.0	2011	1	1
1542	1	69.0	2011	1	0
1543	0	43.0	2011	1	0
1544	0	46.0	2011	1	1
1545	0	72.0	2011	1	2
1546	0	54.0	2011	1	0
1547	1	42.0	2011	1	0
1548	1	73.0	2011	1	0
1549	0	56.0	2011	1	0
1550	1	77.0	2011	1	1
1551	0	34.0	2011	1	0
1552	0	37.0	2011	1	0
1553	0	40.0	2011	1	0
1554	1	54.0	2011	1	0
1555	0	45.0	2011	1	0
1556	0	76.0	2011	1	0
1557	1	45.0	2011	1	0
1558	0	76.0	2011	1	0
1559	0	53.0	2011	1	0
1560	0	59.0	2011	1	1
1561	0	73.0	2011	1	0
1562	0	54.0	2011	1	0
1563	0	75.0	2011	1	0
1564	0	28.0	2011	1	0
1565	0	44.0	2011	1	0
1566	0	72.0	2011	1	0
1567	1	79.0	2011	1	1
1568	0	48.0	2011	1	0
1569	1	69.0	2011	1	1
1570	0	54.0	2011	1	1
1571	0	39.0	2011	1	0
1572	1	68.0	2011	1	0
1573	0	35.0	2011	1	0
1574	1	65.0	2011	1	2
1575	0	58.0	2011	1	0
1576	0	49.0	2011	1	0
1577	0	72.0	2011	1	0
1578	0	48.0	2011	1	0
1579	1	67.0	2011	1	1
1580	1	79.0	2011	1	1
1581	0	42.0	2011	1	0
1582	1	69.0	2011	1	0
1583	0	20.0	2011	1	0
1584	0	45.0	2011	1	0
1585	0	28.0	2011	1	0
1586	1	67.0	2011	1	0
1587	0	76.0	2011	1	0
1588	0	47.0	2011	1	0
1589	1	56.0	2011	1	1
1590	0	21.0	2011	1	0
1591	1	68.0	2011	1	0
1592	0	31.0	2011	1	0
1593	0	72.0	2011	1	2
1594	0	85.0	2011	1	0
1595	1	65.0	2011	1	1
1596	1	77.0	2011	1	1
1597	1	71.0	2011	1	0
1598	0	45.0	2011	1	0
1599	0	83.0	2011	1	0
1600	0	80.0	2011	1	1
1601	0	53.0	2011	1	0
1602	0	34.0	2011	1	0
1603	0	45.0	2011	1	0
1604	1	55.0	2011	1	0
1605	0	48.0	2011	1	0
1606	0	81.0	2011	1	1
1607	0	57.0	2011	1	0
1608	0	48.0	2011	1	1
1609	1	69.0	2011	1	0
1610	0	61.0	2011	1	0
1611	1	69.0	2011	1	1
1612	1	58.0	2011	1	0
1613	1	82.0	2011	1	0
1614	1	65.0	2011	1	0
1615	0	46.0	2011	1	0
1616	0	41.0	2011	1	0
1617	0	67.0	2011	1	0
1618	0	58.0	2011	1	0
1619	0	48.0	2011	1	0
1620	0	55.0	2011	1	0
1621	1	70.0	2011	1	1
1622	0	18.0	2011	1	0
1623	1	59.0	2011	1	0
1624	1	60.0	2011	1	0
1625	1	69.0	2011	1	0
1626	0	49.0	2011	1	1
1627	0	55.0	2011	1	0
1628	0	36.0	2011	1	0
1629	0	59.0	2011	1	1
1630	0	61.0	2011	1	3
1631	0	53.0	2011	1	0
1632	0	38.0	2011	1	0
1633	0	21.0	2011	1	0
1634	1	66.0	2012	1	0
1635	0	75.0	2012	1	0
1636	0	43.0	2012	1	0
1637	1	75.0	2012	1	0
1638	1	73.0	2012	1	1
1639	1	64.0	2012	1	0
1640	0	54.0	2012	1	1
1641	0	30.0	2012	1	0
1642	0	59.0	2012	1	0
1643	0	70.0	2012	1	1
1644	0	47.0	2012	1	0
1645	1	75.0	2012	1	0
1646	1	65.0	2012	1	0
1647	0	33.0	2012	1	0
1648	1	80.0	2012	1	3
1649	1	72.0	2012	1	0
1650	1	58.0	2012	1	0
1651	0	66.0	2012	1	1
1652	1	68.0	2012	1	3
1653	1	77.0	2012	1	1
1654	1	64.0	2012	1	1
1655	0	46.0	2012	1	0
1656	1	71.0	2012	1	0
1657	1	44.0	2012	1	1
1658	0	42.0	2012	1	0
1659	1	55.0	2012	1	1
1660	1	40.0	2012	1	0
1661	1	59.0	2012	1	0
1662	1	86.0	2012	1	1
1663	0	80.0	2012	1	1
1664	0	47.0	2012	1	1
1665	1	46.0	2012	1	0
1666	0	72.0	2012	1	1
1667	0	44.0	2012	1	1
1668	0	31.0	2012	1	0
1669	0	61.0	2012	1	1
1670	0	57.0	2012	1	0
1671	0	49.0	2012	1	0
1672	0	69.0	2012	1	1
1673	1	56.0	2012	1	1
1674	0	63.0	2012	1	0
1675	0	44.0	2012	1	0
1676	0	18.0	2012	1	0
1677	0	47.0	2012	1	0
1678	0	56.0	2012	1	0
1679	1	38.0	2012	1	0
1680	0	68.0	2012	1	1
1681	0	33.0	2012	1	0
1682	0	71.0	2012	1	1
1683	0	46.0	2012	1	0
1684	0	48.0	2012	1	0
1685	0	61.0	2012	1	0
1686	1	56.0	2012	1	1
1687	0	49.0	2012	1	0
1688	0	46.0	2012	1	0
1689	0	66.0	2012	1	0
1690	0	60.0	2012	1	1
1691	1	63.0	2012	1	0
1692	1	45.0	2012	1	2
1693	0	70.0	2012	1	1
1694	0	46.0	2012	1	1
1695	0	50.0	2012	1	0
1696	0	66.0	2012	1	1
1697	1	71.0	2012	1	0
1698	0	68.0	2012	1	0
1699	0	47.0	2012	1	0
1700	1	48.0	2012	1	1
1701	0	37.0	2012	1	0
1702	0	83.0	2012	1	0
1703	1	49.0	2012	1	1
1704	0	70.0	2012	1	1
1705	1	73.0	2012	1	1
1706	1	83.0	2012	1	1
1707	1	55.0	2012	1	1
1708	0	69.0	2012	1	1
1709	0	75.0	2012	1	0
1710	0	41.0	2012	1	1
1711	0	38.0	2012	1	0
1712	0	65.0	2012	1	1
1713	0	32.0	2012	1	0
1714	0	47.0	2012	1	0
1715	0	72.0	2012	1	0
1716	0	66.0	2012	1	1
1717	0	43.0	2012	1	0
1718	0	62.0	2012	1	1
1719	0	67.0	2012	1	1
1720	0	68.0	2012	1	1
1721	1	67.0	2012	1	1
1722	0	43.0	2012	1	0
1723	0	45.0	2012	1	0
1724	0	20.0	2012	1	0
1725	1	44.0	2012	1	0
1726	1	66.0	2012	1	1
1727	1	49.0	2012	1	1
1728	1	76.0	2012	1	1
1729	0	75.0	2012	1	0
1730	1	66.0	2012	1	1
1731	0	67.0	2012	1	0
1732	1	24.0	2012	1	2
1733	1	75.0	2012	1	0
1734	1	71.0	2012	1	0
1735	1	62.0	2012	1	0
1736	1	66.0	2012	1	2
1737	1	48.0	2012	1	0
1738	0	75.0	2012	1	1
1739	1	65.0	2012	1	0
1740	0	69.0	2012	1	1
1741	1	62.0	2012	1	1
1742	1	78.0	2012	1	1
1743	0	38.0	2012	1	0
1744	0	41.0	2012	1	0
1745	1	71.0	2012	1	1
1746	1	74.0	2012	1	4
1747	1	63.0	2012	1	0
1748	0	45.0	2012	1	0
1749	0	54.0	2012	1	0
1750	1	69.0	2012	1	0
1751	0	30.0	2012	1	0
1752	1	57.0	2012	1	0
1753	1	68.0	2012	1	1
1754	0	67.0	2012	1	1
1755	0	36.0	2012	1	0
1756	0	48.0	2012	1	0
1757	0	46.0	2012	1	2
1758	0	41.0	2012	1	0
1759	1	61.0	2012	1	1
1760	1	71.0	2012	1	0
1761	1	62.0	2012	1	1
1762	1	79.0	2012	1	1
1763	1	75.0	2012	1	0
1764	1	54.0	2012	1	0
1765	1	44.0	2012	1	0
1766	1	87.0	2012	1	0
1767	0	18.0	2012	1	1
1768	1	86.0	2012	1	1
1769	0	77.0	2012	1	0
1770	0	67.0	2012	1	0
1771	1	78.0	2012	1	1
1772	1	78.0	2012	1	1
1773	0	54.0	2012	1	0
1774	1	80.0	2012	1	0
1775	0	63.0	2012	1	0
1776	1	40.0	2012	1	2
1777	1	63.0	2012	1	0
1778	0	42.0	2012	1	3
1779	1	79.0	2012	1	1
1780	1	62.0	2012	1	0
1781	0	55.0	2012	1	1
1782	0	59.0	2012	1	0
1783	1	57.0	2012	1	0
1784	0	45.0	2012	1	0
1785	1	57.0	2012	1	0
1786	1	57.0	2012	1	0
1787	1	84.0	2012	1	0
1788	1	72.0	2012	1	0
1789	0	60.0	2012	1	1
1790	1	58.0	2012	1	1
1791	0	51.0	2012	1	0
1792	0	74.0	2012	1	1
1793	1	78.0	2012	1	0
1794	0	43.0	2012	1	0
1795	0	82.0	2012	1	1
1796	1	54.0	2012	1	0
1797	0	75.0	2012	1	1
1798	0	31.0	2012	1	0
1799	0	43.0	2012	1	0
1800	0	34.0	2012	1	0
1801	1	38.0	2012	1	0
1802	1	59.0	2012	1	0
1803	1	85.0	2012	1	1
1804	0	56.0	2012	1	0
1805	1	58.0	2012	1	0
1806	0	62.0	2012	1	1
1807	0	40.0	2012	1	0
1808	0	66.0	2012	1	1
1809	0	42.0	2012	1	0
1810	0	79.0	2012	1	0
1811	1	55.0	2012	1	0
1812	0	60.0	2012	1	0
1813	0	40.0	2012	1	0
1814	0	40.0	2012	1	0
1815	1	73.0	2012	1	1
1816	0	54.0	2012	1	1
1817	0	49.0	2012	1	0
1818	1	55.0	2012	1	0
1819	0	50.0	2012	1	0
1820	1	52.0	2012	1	0
1821	0	39.0	2012	1	2
1822	0	54.0	2012	1	0
1823	0	80.0	2012	1	1
1824	0	60.0	2012	1	2
1825	0	54.0	2012	1	0
1826	1	59.0	2012	1	1
1827	0	22.0	2012	1	2
1828	1	75.0	2012	1	1
1829	1	71.0	2012	1	1
1830	1	46.0	2012	1	0
1831	0	54.0	2012	1	0
1832	0	39.0	2012	1	1
1833	1	66.0	2012	1	2
1834	0	61.0	2012	1	0
1835	1	54.0	2012	1	0
1836	1	58.0	2012	1	1
1837	1	58.0	2012	1	1
1838	0	77.0	2012	1	1
1839	1	16.0	2012	1	0
1840	0	56.0	2012	1	0
1841	0	78.0	2012	1	1
1842	1	56.0	2012	1	1
1843	0	71.0	2012	1	0
1844	0	49.0	2012	1	0
1845	1	60.0	2012	1	0
1846	0	49.0	2012	1	0
1847	1	50.0	2012	1	1
1848	0	42.0	2012	1	1
1849	0	46.0	2012	1	1
1850	1	84.0	2012	1	0
1851	0	52.0	2012	1	0
1852	0	49.0	2012	1	0
1853	0	47.0	2012	1	0
1854	0	44.0	2012	1	0
1855	1	76.0	2012	1	0
1856	0	51.0	2012	1	1
1857	0	63.0	2012	1	1
1858	1	81.0	2012	1	1
1859	0	44.0	2012	1	1
1860	0	43.0	2012	1	1
1861	0	69.0	2012	1	1
1862	1	65.0	2012	1	0
1863	0	70.0	2012	1	0
1864	0	66.0	2012	1	0
1865	0	55.0	2012	1	0
1866	0	37.0	2009	1	0
1867	1	74.0	2009	1	1
1868	1	73.0	2009	1	1
1869	1	72.0	2009	1	0
1870	1	57.0	2009	1	1
1871	1	46.0	2009	1	1
1872	0	77.0	2009	1	0
1873	0	28.0	2009	1	0
1874	0	80.0	2009	1	1
1875	0	38.0	2009	1	0
1876	0	50.0	2009	1	0
1877	0	47.0	2009	1	0
1878	0	18.0	2009	1	0
1879	0	63.0	2009	1	0
1880	0	64.0	2009	1	1
1881	0	57.0	2009	1	1
1882	0	56.0	2009	1	0
1883	0	61.0	2009	1	0
1884	0	52.0	2009	1	0
1885	1	74.0	2009	1	1
1886	1	50.0	2009	1	0
1887	0	40.0	2009	1	0
1888	0	64.0	2009	1	1
1889	0	53.0	2009	1	0
1890	1	48.0	2009	1	0
1891	0	50.0	2009	1	2
1892	0	60.0	2009	1	1
1893	0	50.0	2009	1	0
1894	0	35.0	2009	1	0
1895	0	72.0	2009	1	1
1896	0	76.0	2009	1	1
1897	1	72.0	2009	1	0
1898	1	61.0	2009	1	0
1899	0	40.0	2009	1	1
1900	0	73.0	2009	1	0
1901	0	58.0	2009	1	0
1902	0	48.0	2009	1	1
1903	0	43.0	2009	1	0
1904	0	40.0	2009	1	0
1905	1	41.0	2009	1	0
1906	0	68.0	2009	1	0
1907	0	34.0	2009	1	2
1908	0	55.0	2009	1	1
1909	0	33.0	2009	1	0
1910	1	62.0	2009	1	1
1911	0	63.0	2009	1	0
1912	1	73.0	2009	1	0
1913	1	62.0	2009	1	1
1914	0	57.0	2009	1	0
1915	0	42.0	2009	1	0
1916	0	43.0	2009	1	0
1917	0	52.0	2009	1	0
1918	0	44.0	2009	1	0
1919	0	62.0	2009	1	3
1920	0	48.0	2009	1	0
1921	0	39.0	2009	1	0
1922	0	62.0	2009	1	1
1923	0	63.0	2009	1	0
1924	0	51.0	2009	1	0
1925	0	44.0	2009	1	0
1926	0	41.0	2009	1	0
1927	1	65.0	2009	1	0
1928	0	50.0	2009	1	1
1929	0	47.0	2009	1	0
1930	0	38.0	2009	1	1
1931	1	71.0	2009	1	1
1932	0	54.0	2009	1	0
1933	1	73.0	2009	1	1
1934	0	62.0	2009	1	0
1935	0	38.0	2009	1	0
1936	1	54.0	2009	1	0
1937	0	54.0	2009	1	0
1938	0	59.0	2009	1	0
1939	0	82.0	2009	1	0
1940	0	43.0	2009	1	0
1941	0	44.0	2009	1	0
1942	0	71.0	2009	1	0
1943	1	79.0	2009	1	0
1944	1	62.0	2009	1	0
1945	0	27.0	2009	1	0
1946	0	39.0	2009	1	0
1947	1	82.0	2009	1	0
1948	1	67.0	2009	1	1
1949	0	69.0	2009	1	1
1950	0	59.0	2009	1	0
1951	0	17.0	2009	1	0
1952	0	67.0	2009	1	0
1953	1	46.0	2009	1	1
1954	0	59.0	2009	1	0
1955	0	40.0	2009	1	0
1956	0	71.0	2009	1	2
1957	1	69.0	2009	1	1
1958	1	45.0	2009	1	1
1959	1	67.0	2009	1	0
1960	0	45.0	2009	1	0
1961	0	69.0	2009	1	0
1962	0	66.0	2009	1	0
1963	1	43.0	2009	1	0
1964	0	39.0	2009	1	1
1965	0	64.0	2009	1	1
1966	1	70.0	2009	1	0
1967	1	76.0	2009	1	3
1968	0	44.0	2009	1	3
1969	0	61.0	2009	1	0
1970	0	40.0	2009	1	0
1971	0	44.0	2009	1	0
1972	0	65.0	2009	1	1
1973	0	68.0	2009	1	1
1974	1	73.0	2009	1	0
1975	1	53.0	2009	1	1
1976	1	69.0	2009	1	1
1977	0	54.0	2009	1	0
1978	1	83.0	2009	1	0
1979	1	66.0	2009	1	1
1980	0	51.0	2009	1	0
1981	1	71.0	2009	1	1
1982	0	61.0	2009	1	2
1983	0	23.0	2009	1	0
1984	1	53.0	2009	1	1
1985	0	55.0	2009	1	2
1986	0	33.0	2009	1	0
1987	1	66.0	2009	1	1
1988	0	38.0	2009	1	1
1989	1	63.0	2009	1	0
1990	0	62.0	2009	1	1
1991	0	54.0	2009	1	0
1992	1	69.0	2009	1	1
1993	0	57.0	2009	1	0
1994	1	58.0	2009	1	0
1995	0	36.0	2009	1	0
1996	0	81.0	2009	1	1
1997	0	61.0	2009	1	1
1998	0	73.0	2009	1	0
1999	0	61.0	2009	1	0
[truncated: 4,091 more rows]
